# Supplementary material for: Oligofructose Provides Laxation for Irregularity Associated with Low Fiber Intake
Source: PubMed Central journal article supplement (PMC5748822; doi:10.3390/nu9121372), 2017-12-18
Supplement: nutrients-09-01372-s001.pdf [file nutrients-09-01372-s001.pdf]

Supplemental table 1: Blood parameters before and at conclusion of the last treatment phase for participants in the oligofructose ( $n = 45$ ) and maltodextrin (placebo;  $n = 43$ ) groups. Within group differences (before compared with after final treatment period) are marked with \* ( $p < 0.05$ ) or \*\* ( $p < 0.01$ ). Differences between oligofructose and maltodextrin groups are marked with # ( $p < 0.05$ ) or ## ( $p < 0.01$ ).

| Blood parameter<br>(Reference Values) | Oligofructose |                 | Maltodextrin   |                |
|---------------------------------------|---------------|-----------------|----------------|----------------|
|                                       | Baseline      | Treatment       | Baseline       | Treatment      |
| Na (135-148 mEq/L)                    | 141.5 ± 4.0   | 142.5 ± 7.7     | 142.4 ± 4.4    | 145.5 ± 9.1    |
| K (3.5-5.5 mEq/L)                     | 4.20 ± 0.35   | 4.04* ± 0.49    | 4.23 ± 0.46    | 4.22 ± 0.42    |
| Cl (98-106 mEq/L)                     | 106.3 ± 5.3   | 106.5 ± 8.7     | 107.5 ± 3.9    | 110.6* ± 7.5   |
| Gluc (70-100 mg/dL)                   | 84.9 ± 9.7    | 85.1 ± 12.9     | 92.5## ± 14.7  | 88.9 ± 20.7    |
| BUN (7-18 mg/dL)                      | 13.08 ± 6.23  | 12.05 ± 3.82    | 13.17 ± 3.79   | 13.24 ± 4.13   |
| Creat (mg/dL)                         | 0.84 ± 0.71   | 0.81 ± 0.25     | 0.75 ± 0.15    | 0.82** ± 0.19  |
| Males (<1.6 mg/dL)                    | 0.92 ± 0.24   | 1.00 ± 0.24     | 0.85 ± 0.19    | 0.93 ± 0.25    |
| Females (<1.3 g/dL)                   | 0.83 ± 0.77   | 0.77** ± 0.24   | 0.72 ± 0.13    | 0.79** ± 0.15  |
| CO <sub>2</sub> (23-34 mEq/L)         | 25.41 ± 4.19  | 26.77* ± 3.95   | 24.84 ± 3.07   | 26.57* ± 3.65  |
| CPK (IU/L)                            | 253.0 ± 437.7 | 150.9 ± 166.0   | 137.1 ± 133.5  | 169.9 ± 290.3  |
| Males (<160 IU/L)                     | 617.2 ± 756.2 | 256.2 ± 345.0   | 216.2# ± 254.1 | 168.1 ± 126.9  |
| Females (<130 IU/L)                   | 171.9 ± 285.7 | 128.3** ± 82.3  | 113.1 ± 51.9   | 170.5 ± 325.7  |
| AST (<41 IU/L)                        | 27.04 ± 17.76 | 23.67 ± 9.98    | 22.65 ± 6.23   | 22.77 ± 9.72   |
| ALT (<39 IU/L)                        | 18.91 ± 9.81  | 19.16 ± 9.15    | 18.49 ± 7.70   | 18.37 ± 8.10   |
| ALKP (35-123 IU/L)                    | 73.69 ± 23.89 | 74.20 ± 23.49   | 73.79 ± 32.74  | 73.37 ± 36.54  |
| GGT (IU/L)                            | 12.20 ± 10.18 | 11.43 ± 6.82    | 13.53 ± 10.04  | 14.02 ± 11.29  |
| Males (<55 IU/L)                      | 20.13 ± 20.07 | 16.50 ± 9.56    | 13.10 ± 5.84   | 14.80 ± 12.36  |
| Females (<36 IU/L)                    | 10.38 ± 5.35  | 10.11** ± 5.68  | 13.67 ± 11.08  | 13.79 ± 11.13  |
| Bili (0.2-1.2 mg/dL)                  | 0.74 ± 0.91   | 0.69 ± 0.47     | 0.66 ± 0.41    | 0.64 ± 0.43    |
| Alb (3.5-5.3 g/dL)                    | 4.21 ± 0.41   | 4.12 ± 0.48     | 4.28 ± 0.43    | 4.21 ± 0.46    |
| Ca (8.5-10.5 mg/dL)                   | 9.38 ± 0.52   | 9.48 ± 0.58     | 9.55 ± 0.51    | 9.76 ± 0.97    |
| Mg (1.5-2-6 mg/dL)                    | 2.06 ± 0.24   | 1.97** ± 0.21   | 2.05 ± 0.20    | 2.03 ± 0.30    |
| Phos (2.5-4.8 mg/dL)                  | 4.20 ± 0.58   | 4.16 ± 0.63     | 4.20 ± 0.67    | 4.26 ± 0.63    |
| Chol (<200 mg/dL)                     | 173.7 ± 37.6  | 174.6 ± 38.9    | 182.8 ± 35.0   | 184.5 ± 38.8   |
| TG (<150 mg/dL)                       | 90.3 ± 54.4   | 93.5 ± 63.4     | 89.9 ± 53.7    | 102.7** ± 61.5 |
| HDL (mg/dL)                           | 54.26 ± 14.12 | 55.63 ± 14.76   | 54.34 ± 12.76  | 54.47 ± 12.60  |
| Males (>40 mg/dL)                     | 47.03 ± 16.70 | 51.35 ± 17.95   | 50.95 ± 11.30  | 45.37* ± 12.02 |
| Females (>50 mg/dL)                   | 56.04 ± 13.07 | 56.74** ± 13.90 | 55.37 ± 13.16  | 57.22 ± 11.58  |
| LDL (<100 mg/dL)                      | 101.3 ± 32.3  | 100.2 ± 34.4    | 110.5 ± 30.4   | 109.5 ± 34.3   |
| Uric (2.5-7.7 mg/dL)                  | 4.37 ± 1.39   | 4.45 ± 1.28     | 4.54 ± 1.21    | 4.77* ± 1.27   |

**Abbreviations:**

Na=Sodium, K=Potassium, Cl=Chloride, Gluc=Glucose, BUN=Blood urea nitrogen, Creat=Creatinine, CO<sub>2</sub>=Carbon dioxide, CPK=Creatine phosphokinase, AST=Aspartate aminotransferase, ALT=Alanine aminotransferase, ALKP=Alkaline phosphatase, GGT=Gamma glutamyltransferase, Bili=Bilirubin, Alb=Albumin, Ca=Calcium, MG=Magnesium, Phos=Phosphate, Chol=Cholesterol, TG=Triglycerides, HDL=High density lipoprotein, LDL=Low density lipoprotein, Uric=Uric acid
